# Supplementary material for: Fetal Left Ventricle Function Evaluated by Two-Dimensional Speckle-Tracking Echocardiography across Clinical Stages of Severity in Growth-Restricted Fetuses
Source: MDPI journal article supplement (doi:10.3390/diagnostics14050548), 2024-03-05

**Supplementary Figure S1.** Differences in LV segmental strain behavior between FGR groups across gestational age. FGR, fetal growth restriction; SGA, small for gestational age.

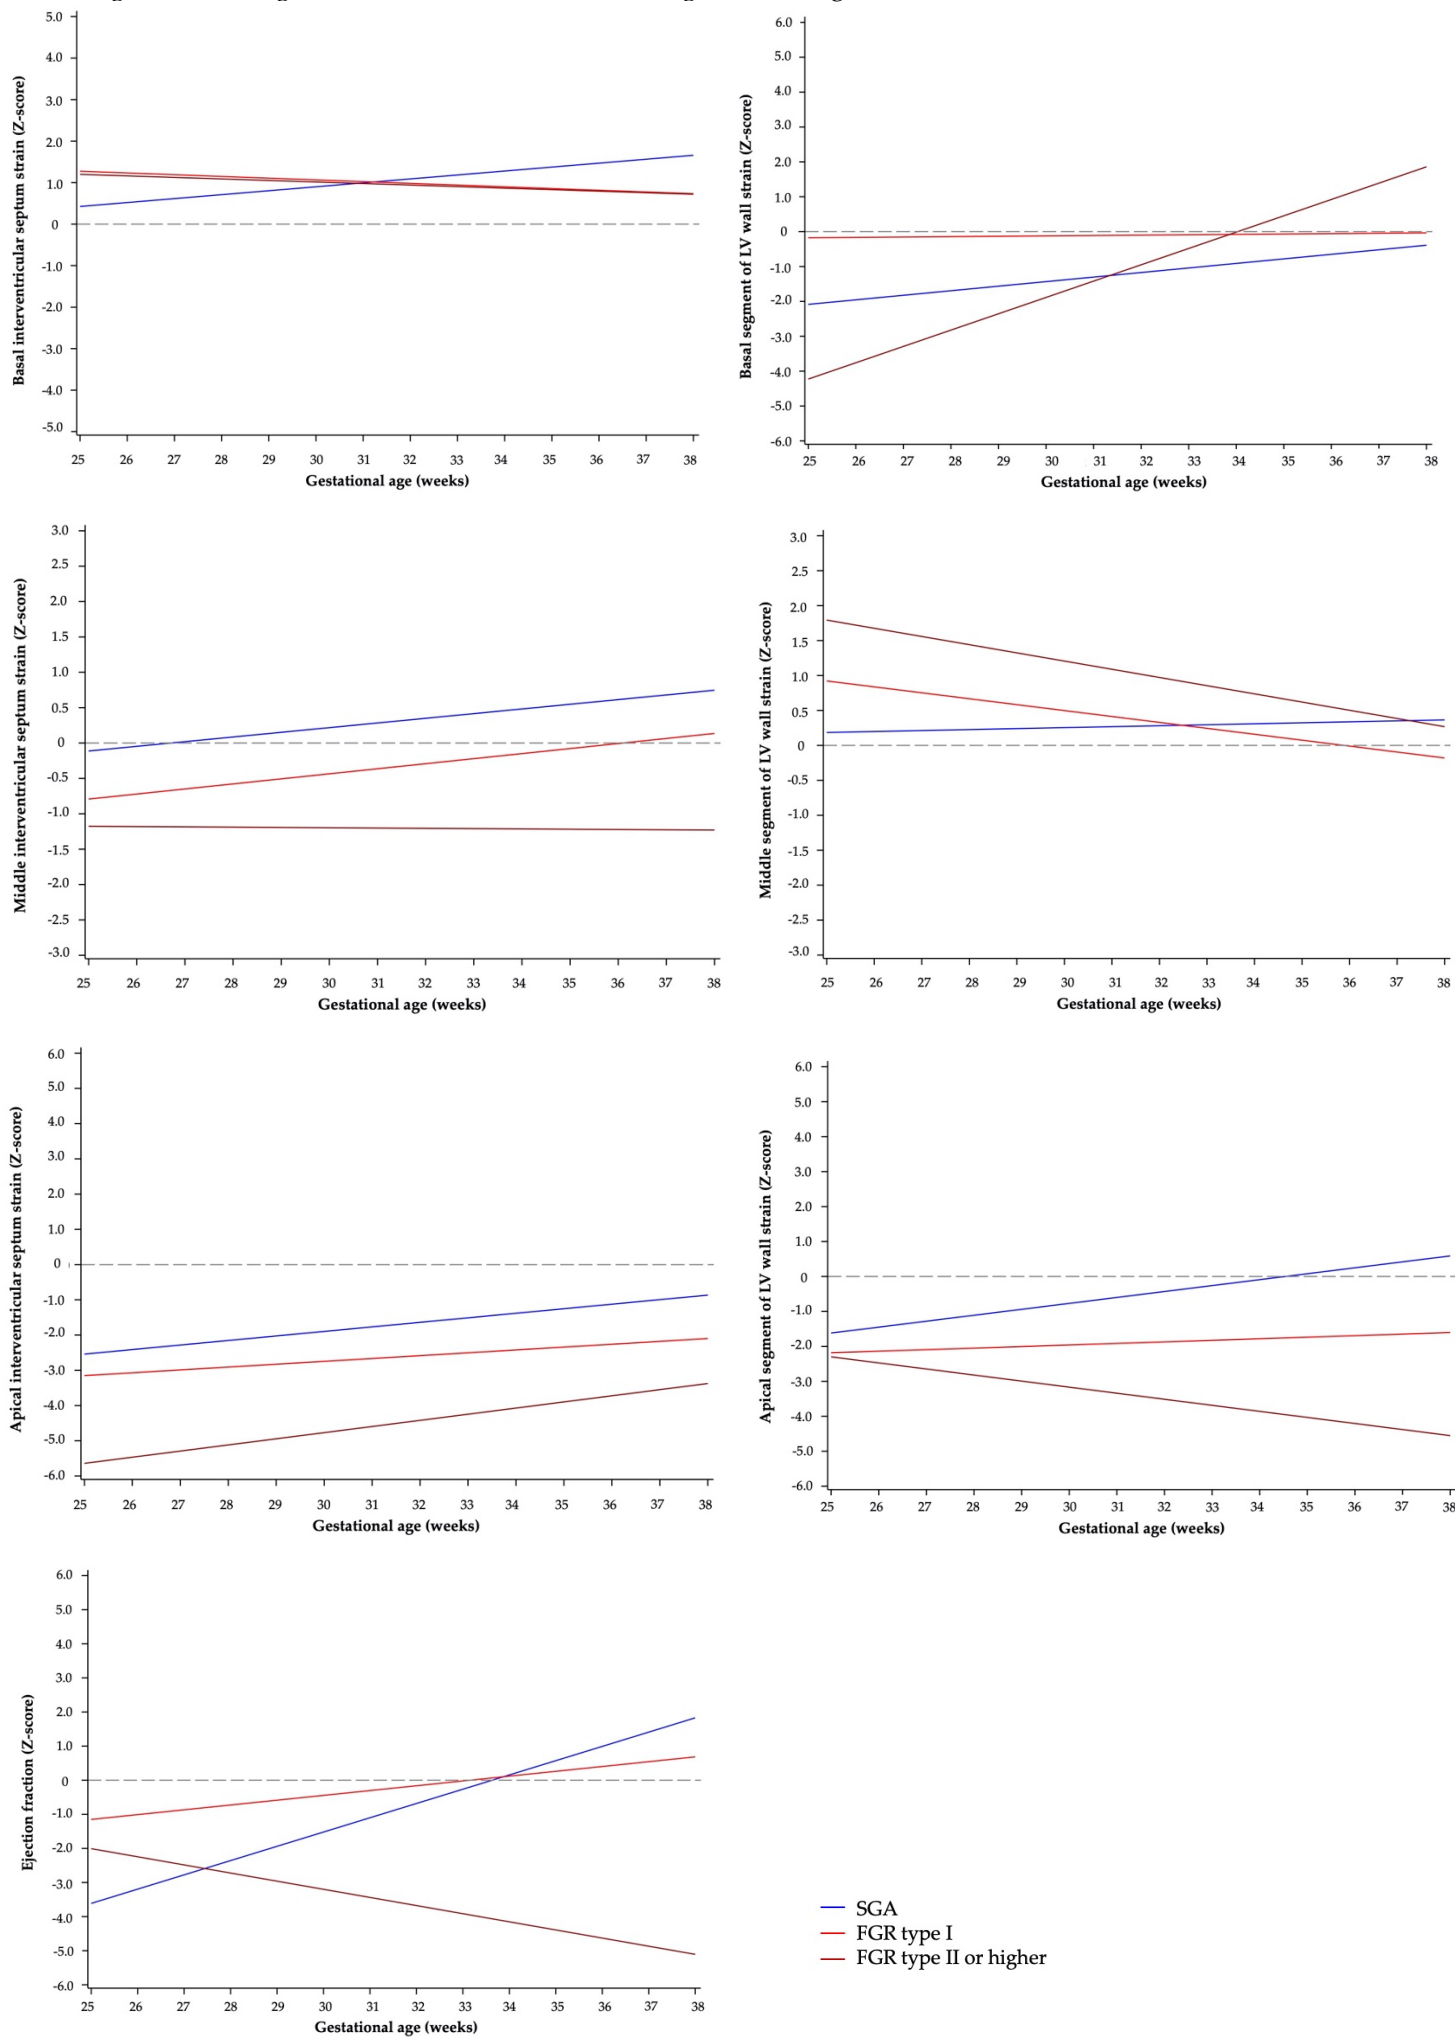

Supplement: s1 [file s1]
